# Supplementary material
Source: PubMed Central journal article supplement (PMC7786841)
Supplement: JCB884742_Supplemetal_Material.pdf [file JCB884742_Supplemetal_Material.pdf]

## Supplementary material

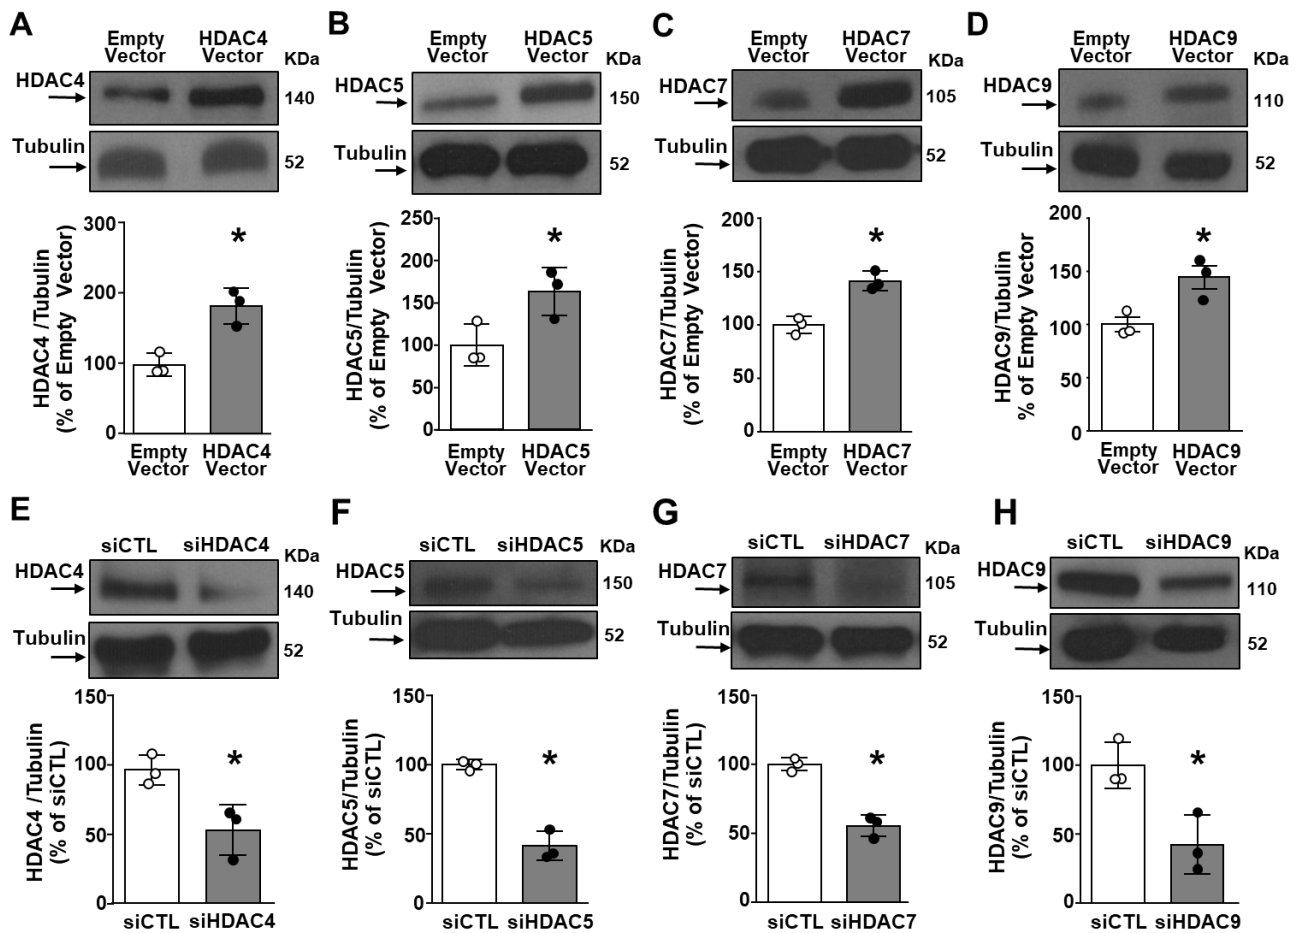

Supplemental Fig. 1

## Supplementary Fig 1.

## Cortical neurons

transfected with constructs or siRNAs for HDAC4, HDAC5, HDAC7, and HDAC9.

**(A-D)** Representative WB with quantification in cortical neurons after 24 h of transfection with vectors overexpressing HDAC4 (n=3), HDAC5 (n=3), HDAC7 (n=3) and HDAC9 (n=3). \*p < 0.05 vs Empty Vector, Student t test. **(E-H)** Representative WB with quantification in cortical neurons after 24 h of transfection with siRNAs against HDAC4 (n=3), HDAC5 (n=3), HDAC7 (n=3), HDAC9 (n=3). \*p < 0.05 vs siCTL, Student t test.

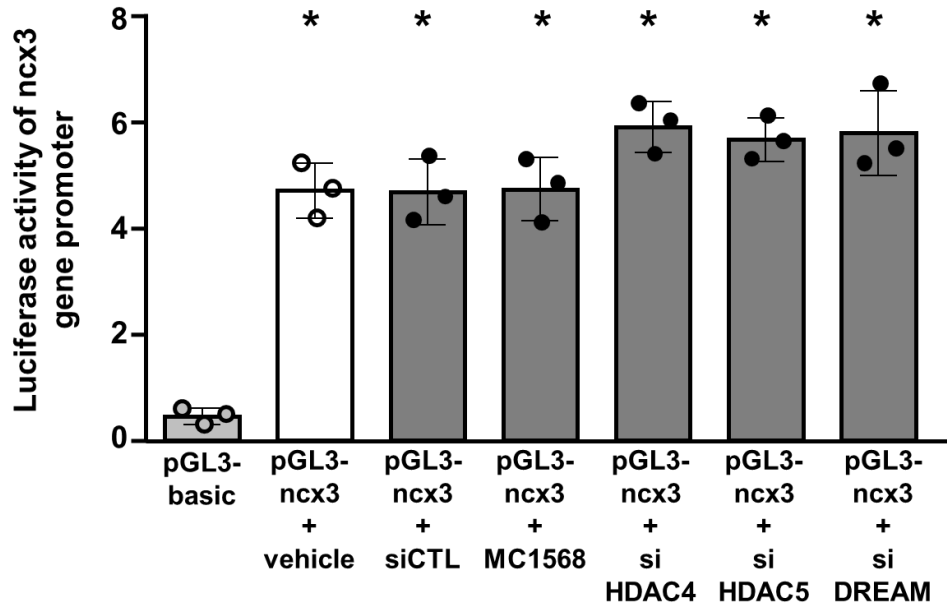

**Supplementary Fig 2. Effect of MC1568, siHDAC4 siHDAC5 and siDREAM on *ncx3* promoter activity in U87 glial cells.**

**(A)** Luciferase activity of *ncx3* gene promoter WT (pGL3-*ncx3*) in the following experimental conditions: **(1)** pGL3-basic, **(2)** pGL3-*ncx3*+vehicle, **(3)** pGL3-*ncx3*+siCTL **(4)** pGL3-*ncx3*+MC1568, **(5)** pGL3-*ncx3*+siHDAC4, **(6)** pGL3-*ncx3*+siHDAC5 and **(7)** pGL3-*ncx3*+siDREAM. Cells were treated with MC1568 or vehicle for a 2-h pulse (n=3). \*p < 0.05 vs pGL3-basic, one-way ANOVA, followed by Turkey's multiple comparison test.

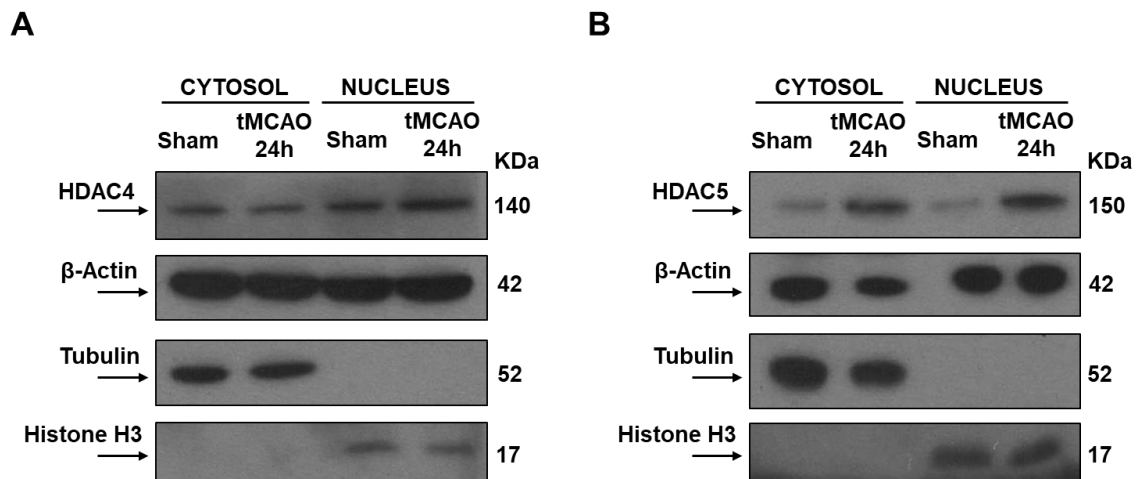

**Supplementary Fig 3. Effect of 24 h tMCAO on cytosol/nucleus localization of HDAC4 and HDAC5.**

**(A, B)**, Western blots of HDAC4 and HDAC5 protein levels after 24 h of tMCAO. β-actin was used as loading control, tubulin and histone H3 (H3) were used to verify the integrity of the cytoplasmic and nuclear fraction of the samples.

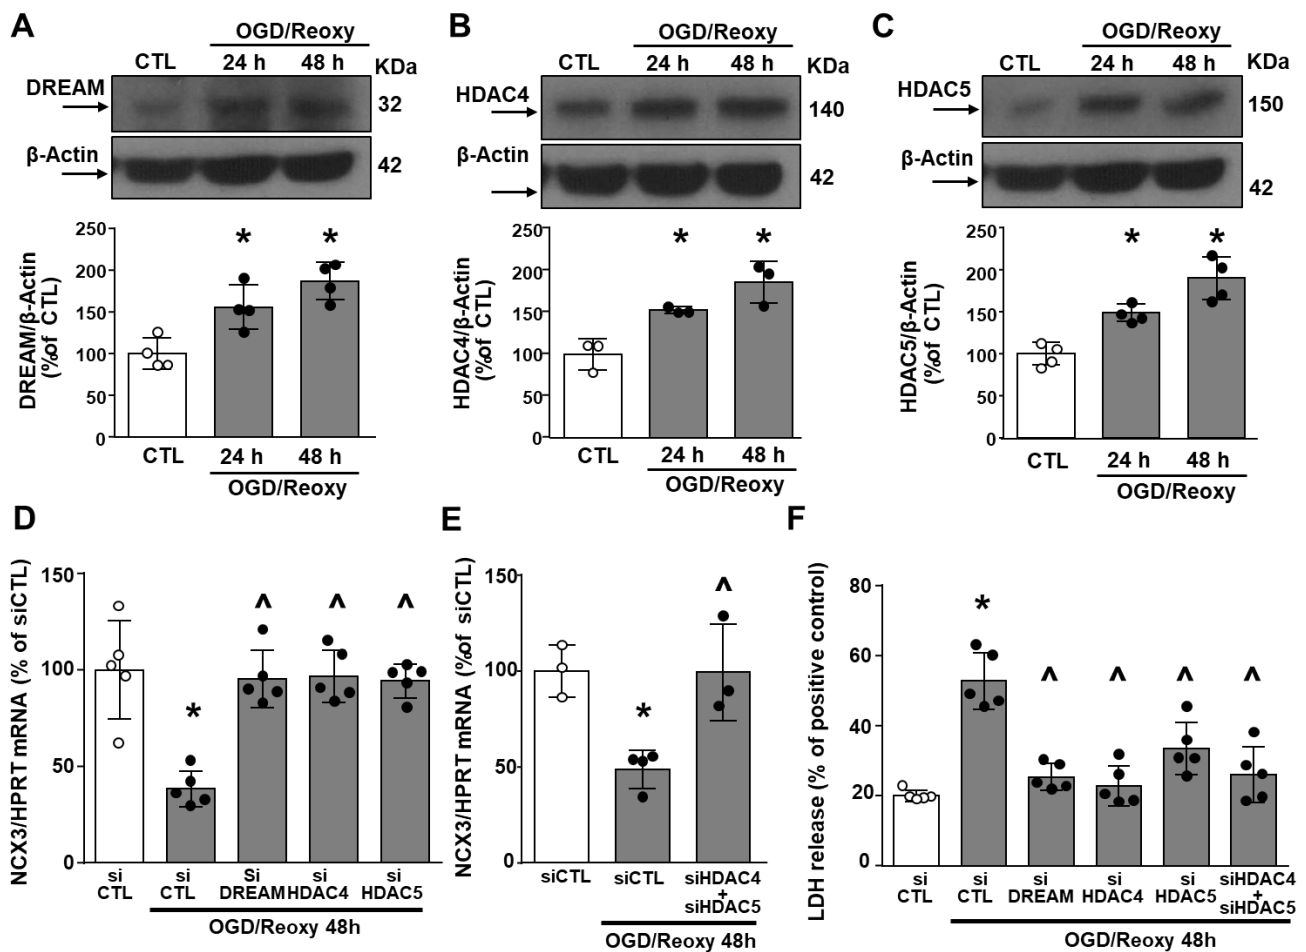

**Supplementary Fig 4. Effect of DREAM, HDAC4 and HDAC5 knockdown on cell survival and *ncx3* gene expression in cortical neurons exposed to OGD/Reoxy.**

**(A-C)** Western blots of DREAM, HDAC4 and HDAC5 protein levels after 12 h and 24 h of OGD/Reoxy (n=3/4). \*p < 0.05 vs CTL. The same filter immunoblotted with anti-HDAC5 was stripped and re-probed with anti-DREAM antibody. **(D,F)** Effect of siDREAM, siHDAC4, siHDAC5 and siHDAC4+siHDAC5, transfected in cortical neurons exposed to 48 h of OGD/Reoxy on: **(D,E)** *ncx3* gene (n=3/5) and **(F)** LDH release (n=5). \*p ≤ 0.05 vs siCTL and  $\Delta$ p ≤ 0.05 vs siCTL + OGD/Reoxy 48h, one-way ANOVA, followed by Turkey's multiple comparison test.

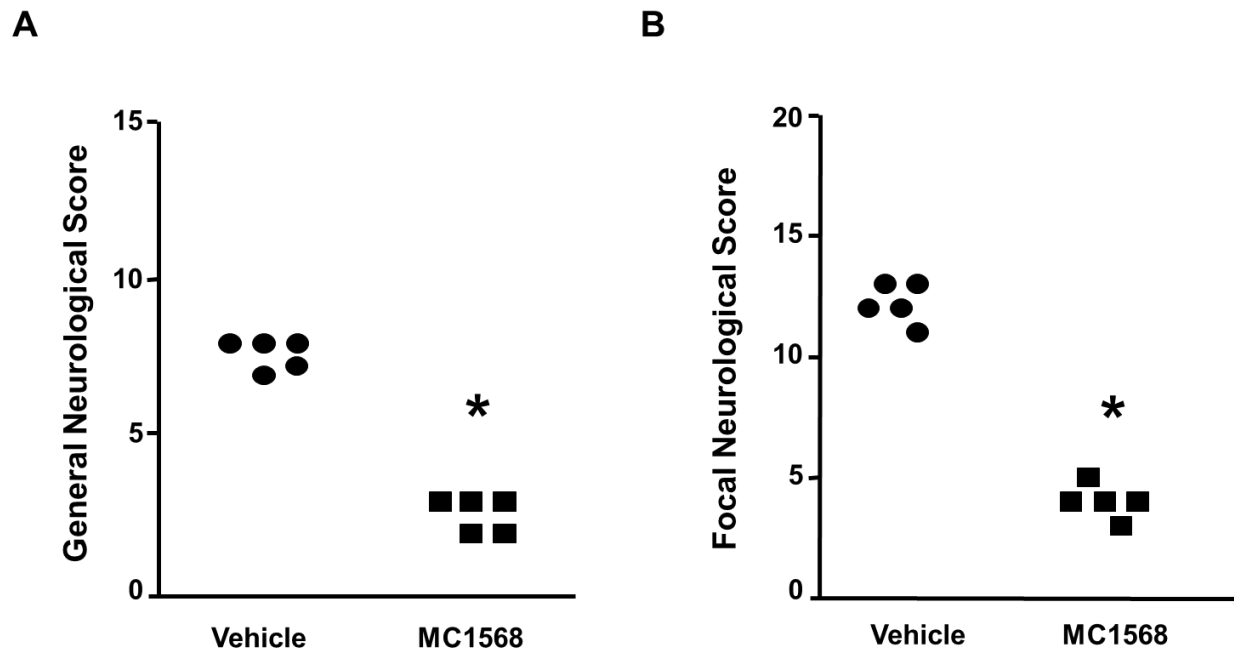

**Supplementary Fig 5. Evaluation of general and focal neurological deficits after MC1568 icv injected in ischemic rats.**

**(A,B)** Effect of MC1568 icv administered on general and focal scores evaluated when rats were euthanized 24 h after tMCAO. \* $p < 0.05$  vs Vehicle ( $n=5$ ). Kruskal-Wallis test, followed by Dunn's multiple comparison test.

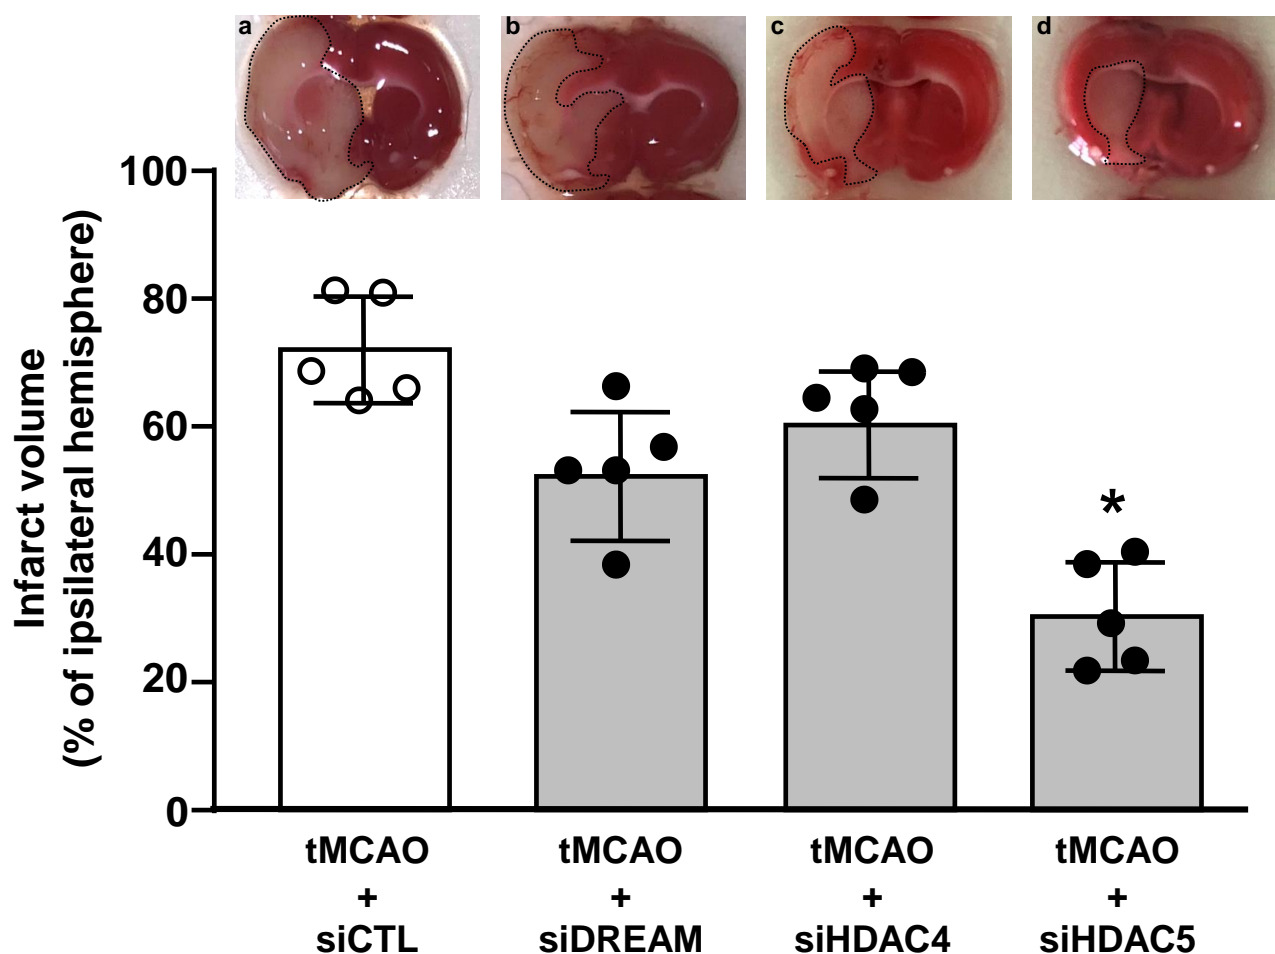

**Supplementary Fig 6. Effect of siRNAs targeting HDAC4, HDAC5 and DREAM on ischemic damage induced in male rats by tMCAO.** % of brain infarct volume in male rats subjected to tMCAO after icv administration of: (a) siCTL, (b) siDREAM, (c) siHDAC4, and (d) siHDAC5. Representative brain slices from each experimental group are shown at the top of each column (n=5). Ischemic rats were euthanized 24 h after tMCAO. % of the infarct volume was compared to the ipsilateral hemisphere. \*p ≤0.05 vstMCAO+siCTL+Vehicle; two-way ANOVA, followed by Newman-Keuls test.
